# Supplementary material for: Spontaneous resolution of four-coordinate Zn(ii) complexes in the formation of three-dimensional metal–organic frameworks
Source: Royal Society of Chemistry journal article supplement (doi:10.1039/c0ce00206b), 2010-01-01
Supplement: c0ce00206b.pdf [file c0ce00206b.pdf]

*Supporting Information*

**Spontaneous Resolution of Four-Coordinate Zn(II) Complexes in the Formation of Three-Dimensional Metal-Organic Frameworks †**

Wen-Ting Liu,<sup>a</sup> Yong-Cong Ou,<sup>a</sup> Zhuo-jia Lin,<sup>\*ab</sup> and Ming-Liang Tong<sup>\*a</sup>

<sup>a</sup> *Key Laboratory of Bioinorganic and Synthetic Chemistry of Ministry of Education / State Key Laboratory of Optoelectronic Materials and Technologies, School of Chemistry and Chemical Engineering, Sun Yat-Sen University, Guangzhou 510275, China. E-mail:*

*[tongml@mail.sysu.edu.cn](mailto:tongml@mail.sysu.edu.cn) (MLT); [chcandy@gmail.com](mailto:chcandy@gmail.com) (ZJL)*

<sup>b</sup> *State Key Laboratory of Inorganic Synthesis & Preparative Chemistry, Jilin University, Changchun 130012, P. R. China.*

## Experimental Section:

**Materials and Physical Measurements.** The reagents and solvents employed were commercially available and used as received without further purification. The C, H, and N microanalyses were carried out with an Elementar Vario-EL CHNS elemental analyzer. The FT-IR spectra were recorded from KBr pellets in the range 4000-400  $\text{cm}^{-1}$  on a Bio-Rad FTS-7 spectrometer. X-ray powder diffraction (XRD) intensities for **1** was measured at 293 K on a Rigaku D/max-III A diffractometer (Cu-K $\alpha$ ,  $\lambda = 1.54056 \text{ \AA}$ ). The crushed single-crystalline powder samples were prepared by crushing the crystals and scanned from 5-60° with a step of 0.4°/s. Calculated pattern of **1** were generated with Mercury. The CD spectra of **1a** and **1b** were obtained on a Circular Dichroism Spectrometer [J810] at room temperature. The photoluminescent spectra of **1** were carried out with Combined Fluorescence Lifetime and Steady State Spectrometer [FLSP920] at room temperature.

## Hydrothermal Synthesis.

Zn(bdt) (**1a**) and (**1b**). A mixture of  $\text{ZnCl}_2 \cdot n\text{H}_2\text{O}$  (0.2 mmol, 0.027 g) and  $\text{H}_2\text{bdt}$  (0.1 mmol, 0.025 g) and distilled  $\text{H}_2\text{O}$  (10 mL) was sealed in a 23-mL Teflon-liner autoclave. Heated in an oven to 160 °C for 120 hs, and then cooled to room temperature at a rate of 5 °C  $\text{h}^{-1}$ , yielded colorless block crystals of **1** (yields 8 mg, calcd. 28.8 %, based on  $\text{H}_2\text{bdt}$ ) Elemental analysis calcd. (%) for  $\text{C}_8\text{H}_4\text{N}_8\text{Zn}$ : C 34.62, H 1.45, N 40.37; Found: C 34.79, H 1.973, N 40.20; IR (4000 – 400  $\text{cm}^{-1}$ ): 3432 w, 2355 w, 1697 w, 1552 m, 1445 s, 1367 m, 1242 m, 1158 s, 1049 m, 851 s, 751 s, 555 m, 481 m.

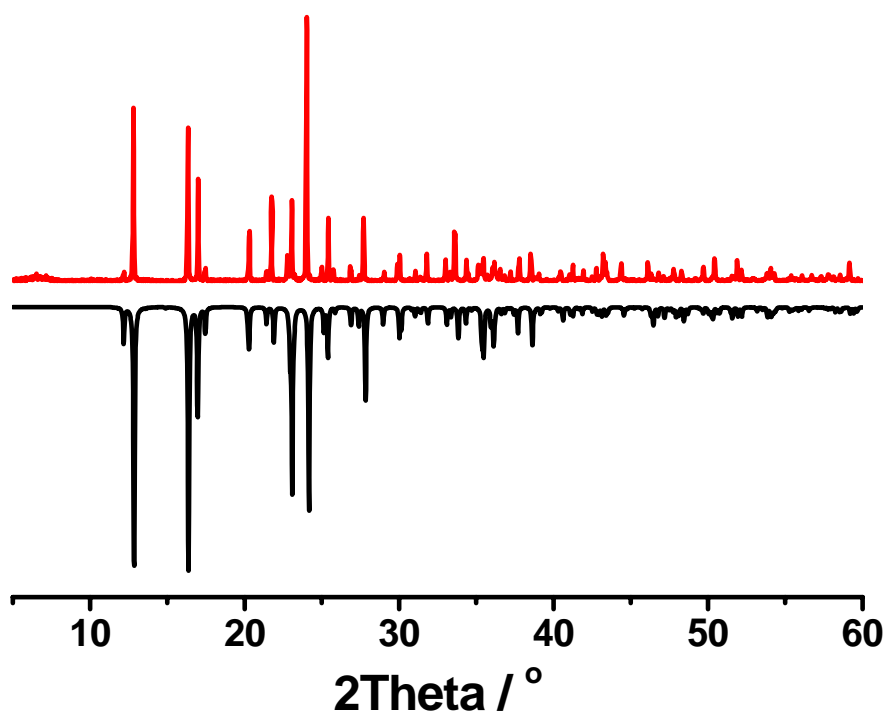

**Fig. S1.** XRD patterns of **1** (red) and simulated (black).

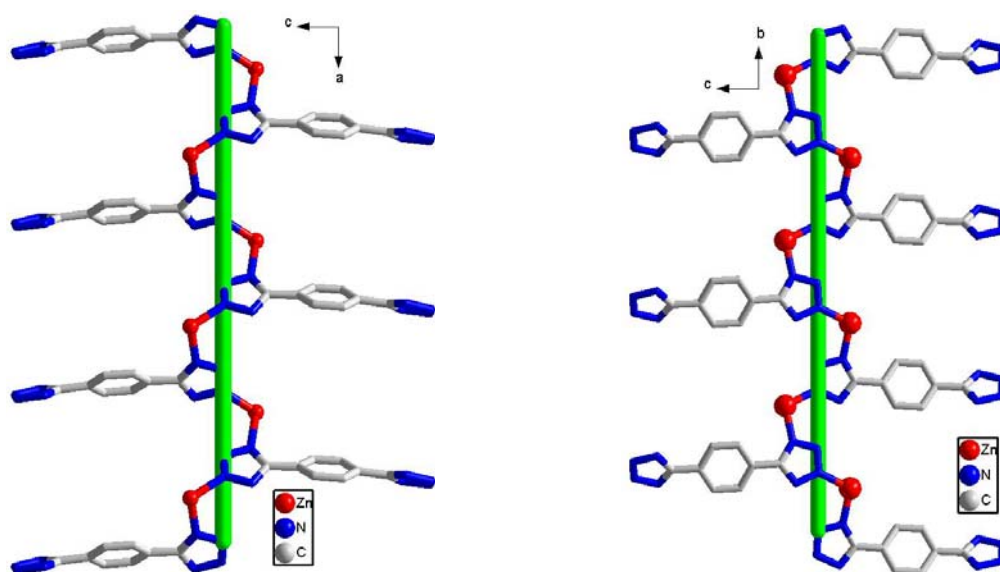

**Fig. S2.** View of the helical chains running along the *a* (left) and *b* axis(right) in **1a**.

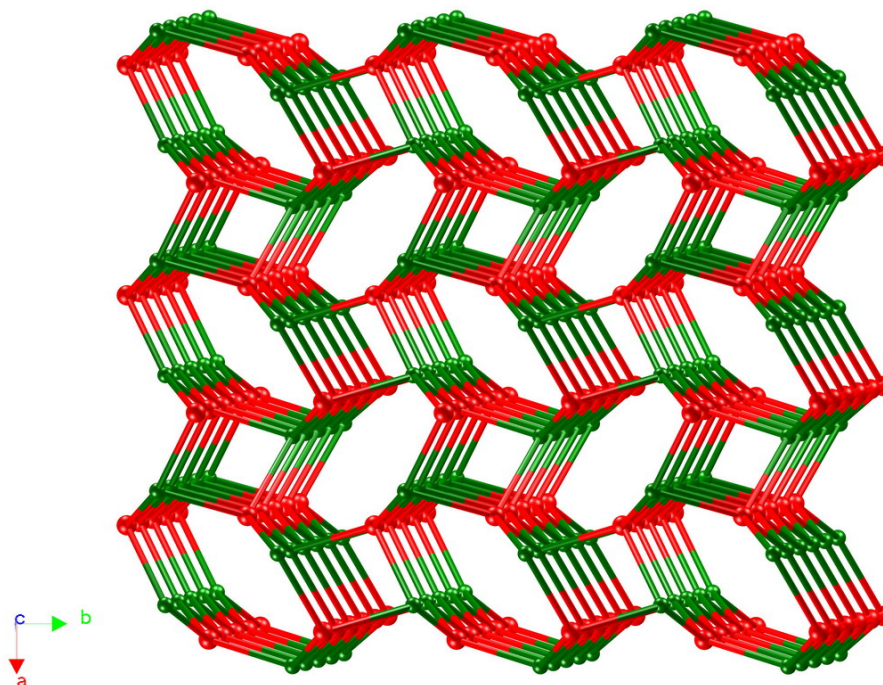

**Fig. S3.** Topological view showing an unc network based on the 3D framework of **1b** (red and green balls represent two kinds of four-connected nodes, zinc centers and bdt ligands).

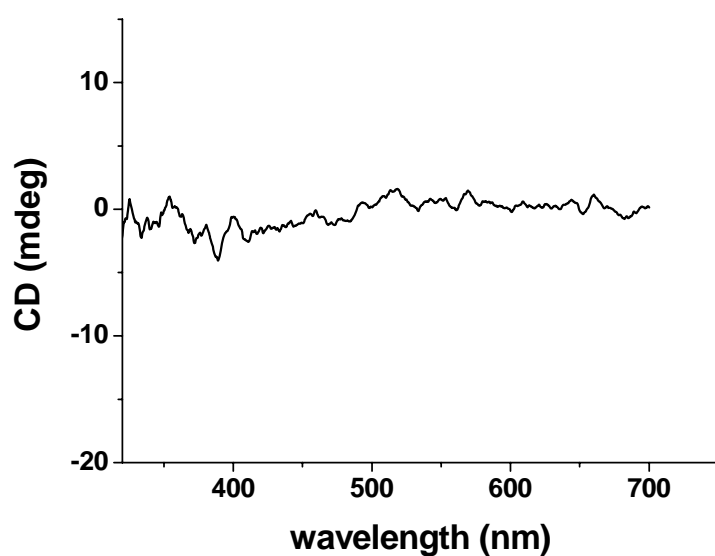

**Fig. S4.** The solid -state CD spectra of bulky sample of **1(1a and 1b)**.
